# Supplementary material for: Impact of Psychiatric Diagnoses and Treatment on Postoperative Outcomes Among Patients Undergoing Surgery for Colorectal Cancer
Source: Atypon-hosted journal article supplement (doi:10.1176/appi.ps.201900559), 2021-02-09
Supplement: appi.ps.201900559.ds001.pdf [file appi.ps.201900559.ds001.pdf]

Supplemental Table 1. ICD-9 Codes for Mental Health Disorders

| <b>Diagnosis</b>              | <b>ICD-9 Code</b>                                                                 |
|-------------------------------|-----------------------------------------------------------------------------------|
| Depression Disorders          | 296.20–296.26, 296.30-296.36, 300.4, 311.00, and 293.83                           |
| Anxiety Disorders             | 293.84, 293.89, 300.00-300.02, 300.09, 300.21, 300.23, 300.29, 300.3              |
| Posttraumatic Stress Disorder | 309.81, 308.0                                                                     |
| Bipolar Disorder              | 296.00-296.06, 296.40-296.89, 301.13                                              |
| Psychotic Disorders           | 295.10-295.90, 296.90, 297.1, 297.3, 298.8, 299.10                                |
| Personality Disorders         | 301.0, 301.20, 301.22, 301.4, 301.50, 301.6, 301.7, 301.81, 301.82, 301.83, 301.9 |
| Substance Use Disorders       | 303.0-3.3.03, 303.90-303.93, 304.0-301.9, 305.0-305.9                             |
| Cognitive Disorders           | 290.4, 294.1, 294.2, 331.1, 331.82, 331.83, 438.0, 854.01, 959.01                 |

ICD-9 = International Classification of Diseases, 9<sup>th</sup> Revision

Supplemental Table 2. Mental Health Treatment

|                             |                                                                                                                                                                                                                                                                                                                                                                                                                                                                       |
|-----------------------------|-----------------------------------------------------------------------------------------------------------------------------------------------------------------------------------------------------------------------------------------------------------------------------------------------------------------------------------------------------------------------------------------------------------------------------------------------------------------------|
| CPT Codes for Psychotherapy | 90804, 90806, 90808, 90810-90829, 90832, 90834, 90837, 90839, 90845, 90846, 90847, 90849, 90853, 90875, 90876, 90884- 90904, 96152- 96155                                                                                                                                                                                                                                                                                                                             |
| Psychiatric Medications     | <p><u>antidepressant medications</u>: amitriptyline, bupropion, citalopram, doxepin, duloxetine, escitalopram, fluoxetine, mirtazapine, nortriptyline, paroxetine, sertraline, venlafaxine</p> <p><u>antianxiety medications</u>: alprazolam, buspirone, chlordiazepoxide, clonazepam, diazepam, lorazepam, risperidone</p> <p><u>antipsychotic medications</u>: aripiprazole, chlorpromazine, haloperidol, olanzapine, prochlorperazine, quetiapine, ziprasidone</p> |

CPT = current procedural terminology

**Supplemental Table 3. Postoperative Outcomes by Mental Health Diagnosis and Treatment Type**

|                                | Total N      | >1 Complication |      | LOS    |     | 90-Day Readmission |      |
|--------------------------------|--------------|-----------------|------|--------|-----|--------------------|------|
|                                |              | n               | %    | Median | IQR | n                  | %    |
| <b>No MH Diagnosis</b>         | 49,932       | 14,882          | 29.9 | 8      | 6   | 11,458             | 22.9 |
| <b>Depression Disorders</b>    | <b>2,738</b> |                 |      |        |     |                    |      |
| No Treatment                   | 797          | 237             | 29.7 | 8      | 7   | 228                | 28.6 |
| Medication Only                | 1,864        | 558             | 29.9 | 7      | 6   | 477                | 25.6 |
| Psychotherapy Only             | 77           | 22              | 28.6 | 7      | 6   | 16                 | 20.8 |
| Medication + Psychotherapy     | 0            | 0               | 0.0  | -      | -   | 0                  | 0.0  |
| <b>Anxiety Disorders</b>       | <b>942</b>   |                 |      |        |     |                    |      |
| No Treatment                   | 258          | 71              | 27.5 | 8      | 5   | 53                 | 20.5 |
| Medication Only                | 665          | 219             | 32.9 | 8      | 7   | 180                | 27.1 |
| Psychotherapy Only             | 19           | 7               | 36.8 | 8      | 6   | 4                  | 21.1 |
| Medication + Psychotherapy     | 0            | 0               | 0.0  | -      | -   | 0                  | 0.0  |
| <b>PSTD</b>                    | <b>1,762</b> |                 |      |        |     |                    |      |
| No Treatment                   | 505          | 139             | 27.5 | 7      | 6   | 129                | 25.5 |
| Medication Only                | 1,179        | 355             | 30.1 | 7      | 6   | 315                | 26.7 |
| Psychotherapy Only             | 78           | 27              | 34.6 | 7      | 5   | 16                 | 20.5 |
| Medication + Psychotherapy     | 0            | 0               | 0.0  | -      | -   | 0                  | 0.0  |
| <b>Bipolar Disorders</b>       | <b>505</b>   |                 |      |        |     |                    |      |
| No Treatment                   | 129          | 39              | 30.2 | 7      | 6   | 45                 | 34.9 |
| Medication Only                | 327          | 97              | 29.7 | 7      | 7   | 81                 | 24.8 |
| Psychotherapy Only             | 18           | 2               | 11.1 | 6.5    | 3   | 4                  | 22.2 |
| Medication + Psychotherapy     | 31           | 12              | 38.7 | 8      | 9   | 7                  | 22.6 |
| <b>Psychotic Disorders</b>     | <b>679</b>   |                 |      |        |     |                    |      |
| No Treatment                   | 166          | 54              | 32.5 | 9      | 9   | 43                 | 25.9 |
| Medication Only                | 408          | 141             | 34.6 | 9      | 10  | 105                | 25.7 |
| Psychotherapy Only             | 27           | 6               | 22.2 | 7      | 9   | 7                  | 25.9 |
| Medication + Psychotherapy     | 78           | 24              | 30.8 | 10.5   | 10  | 28                 | 35.9 |
| <b>Personality Disorders</b>   | <b>105</b>   |                 |      |        |     |                    |      |
| No Treatment                   | 25           | 11              | 44.0 | 7      | 5   | 10                 | 40.0 |
| Medication Only                | 72           | 22              | 30.6 | 8.5    | 8.5 | 17                 | 23.6 |
| Psychotherapy Only             | 3            | 1               | 33.3 | 8      | 24  | 1                  | 33.3 |
| Medication + Psychotherapy     | 5            | 1               | 20.0 | 11     | 2   | 2                  | 40.0 |
| <b>Substance Use Disorders</b> | <b>4,579</b> |                 |      |        |     |                    |      |
| No Treatment                   | 2,990        | 941             | 31.5 | 7      | 6   | 739                | 24.7 |
| Medication Only                | 1,376        | 458             | 33.3 | 8      | 6   | 364                | 26.5 |
| Psychotherapy Only             | 155          | 39              | 25.2 | 8      | 8   | 30                 | 19.4 |
| Medication + Psychotherapy     | 58           | 21              | 36.2 | 9.5    | 12  | 12                 | 20.7 |
| <b>Cognitive Disorders</b>     | <b>239</b>   |                 |      |        |     |                    |      |
| No Treatment                   | 158          | 61              | 38.6 | 8      | 9   | 41                 | 26.0 |
| Medication Only                | 72           | 31              | 43.1 | 11     | 11  | 21                 | 29.2 |
| Psychotherapy Only             | 7            | 4               | 57.1 | 13     | 53  | 2                  | 28.6 |
| Medication + Psychotherapy     | 2            | 0               | 0.0  | 8      | 4   | 1                  | 50.0 |
